# Supplementary material for: Vascular Morphogenesis in the Context of Inflammation: Self-Organization in a Fibrin-Based 3D Culture System
Source: PubMed Central journal article supplement (PMC5996074; doi:10.3389/fphys.2018.00679), 2018-06-05
Supplement: Image_3.pdf [file Image_3.pdf]

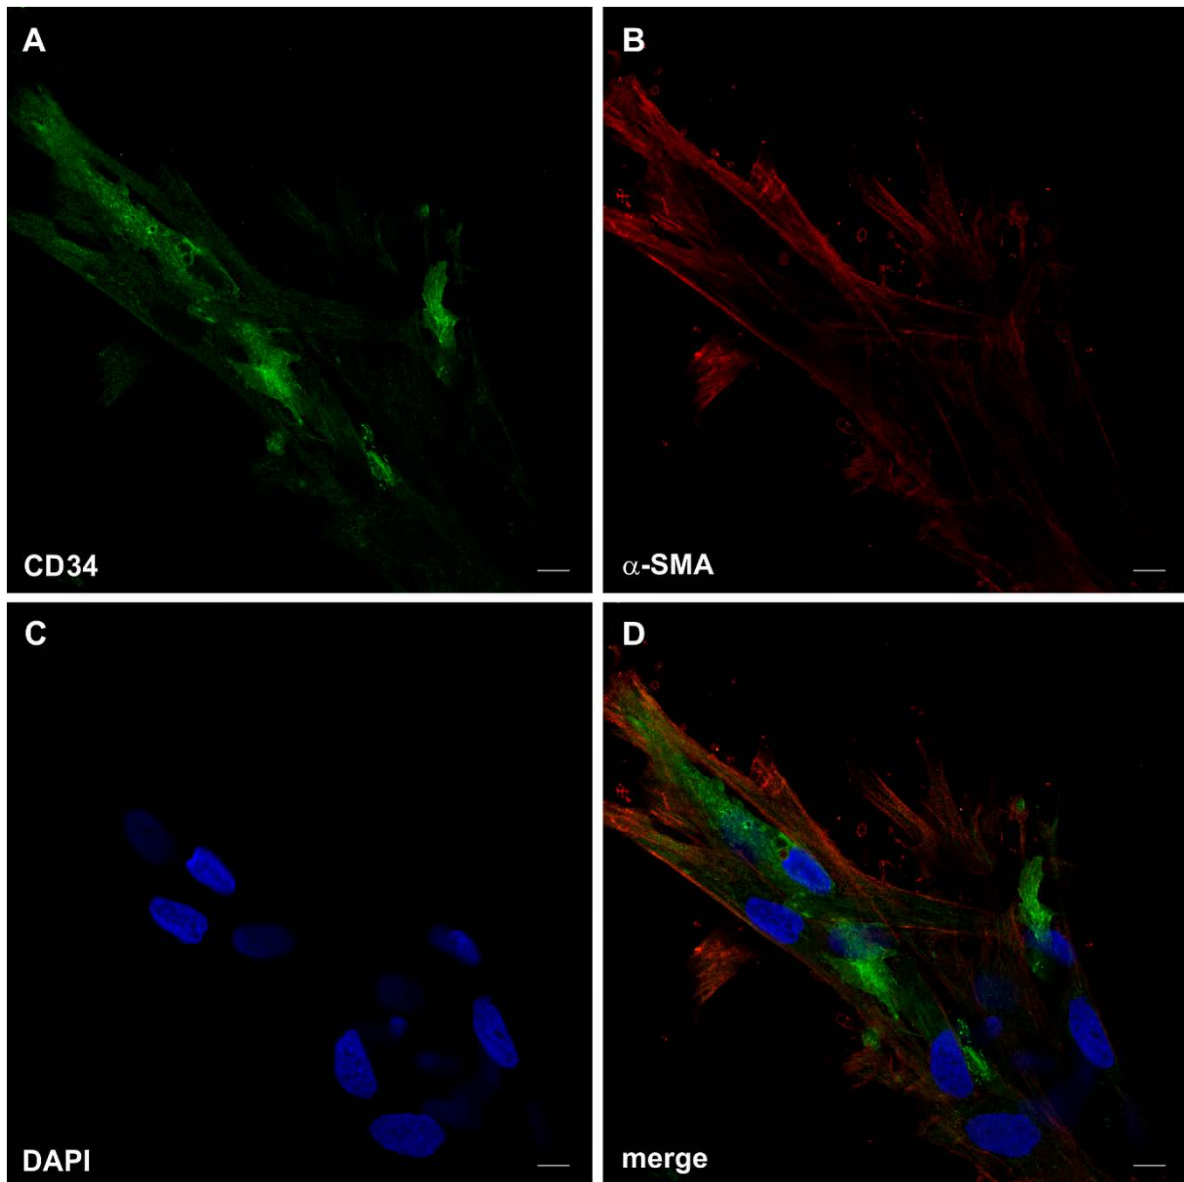

**Supplemental Figure 3: Neo-vessels are surrounded by mural cells.** A developing vascular sprout in the 3D fibrin matrix expressing (A) the endothelial marker CD34 and surrounded by (B)  $\alpha$ -SMA<sup>+</sup> mural cells. (C) DAPI stain. (D) merge. CLSM images of intact 3D fibrin gel explant culture of OA synovial tissue on day 20. Scale bars 10  $\mu$ m.
