# Supplementary material for: Vascular Morphogenesis in the Context of Inflammation: Self-Organization in a Fibrin-Based 3D Culture System
Source: PubMed Central journal article supplement (PMC5996074; doi:10.3389/fphys.2018.00679), 2018-06-05
Supplement: Image_4.pdf [file Image_4.pdf]

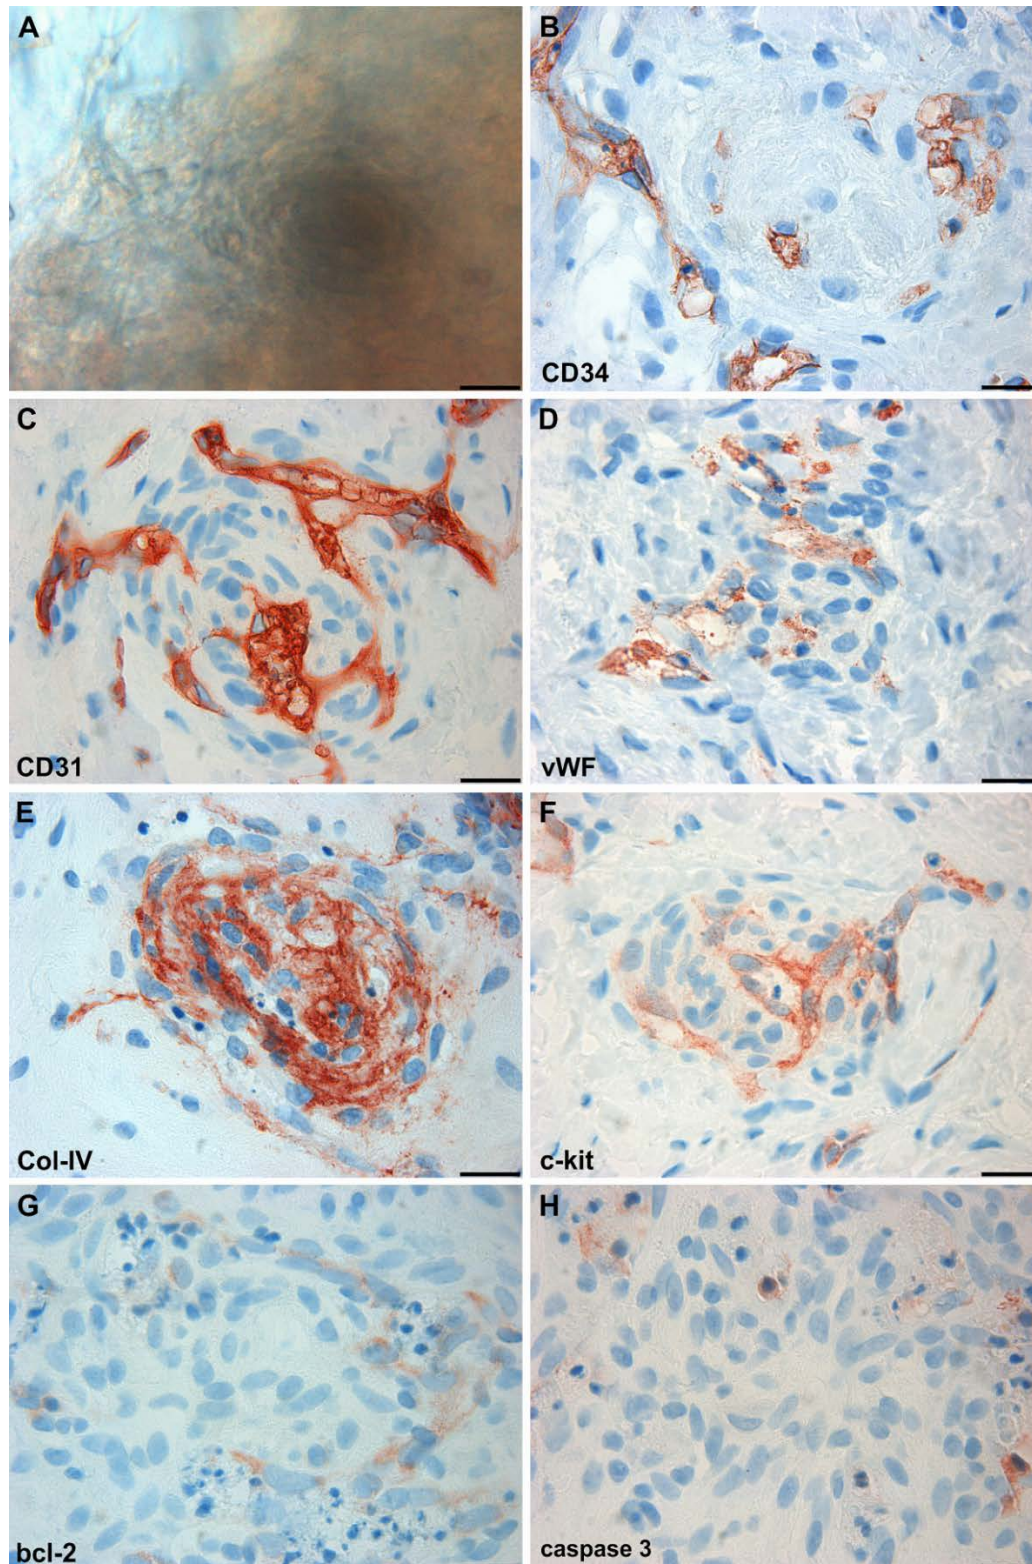

**Supplemental Figure 4: Characterization of intra-synovial cell clusters.** (A) Phase contrast microscopy image of a cell cluster located within a RA synovial tissue sample after 9 days of culture. Immature vascular sprouts emanating from the intra-synovial cell cluster express (B) CD34, (C) CD31, (D) vWF and (F) c-kit. Cells expressing (G) bcl-2 are found in close vicinity to (H) active caspase 3 positive apoptotic cells. (E) Col-IV forms the structural scaffold of the cluster. (B-H) Immunohistochemistry on consecutive paraffin sections of RA synovial tissue cultured in 3D fibrin matrix for 9 days. Scale bars 20  $\mu$ m.
