# Supplementary material for: Vascular Morphogenesis in the Context of Inflammation: Self-Organization in a Fibrin-Based 3D Culture System
Source: PubMed Central journal article supplement (PMC5996074; doi:10.3389/fphys.2018.00679), 2018-06-05
Supplement: Image_5.pdf [file Image_5.pdf]

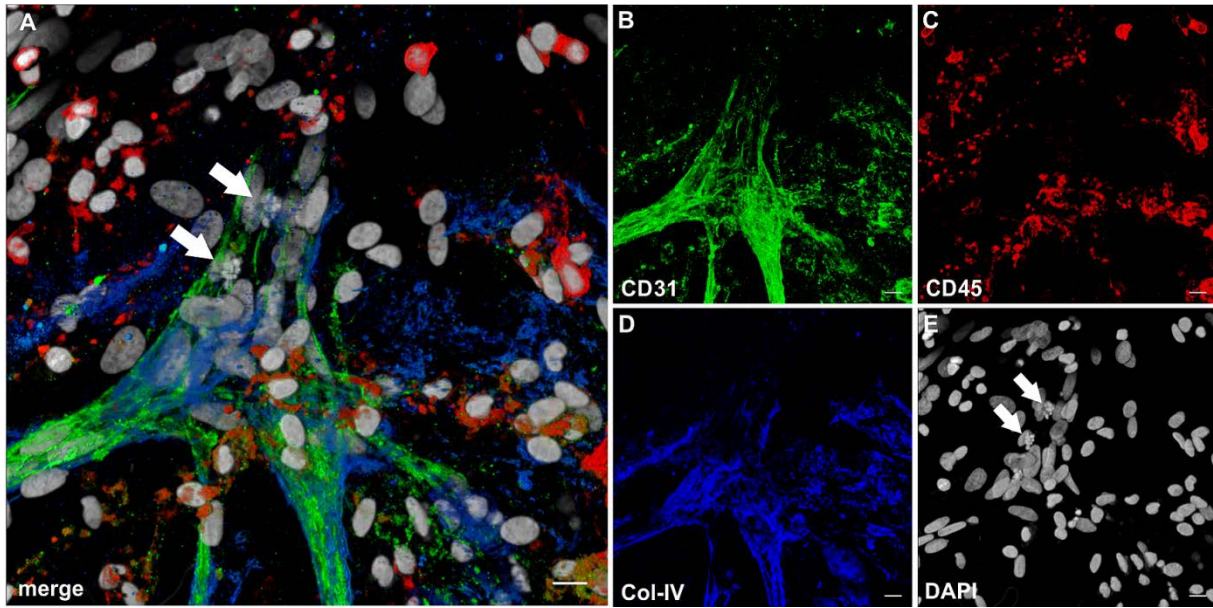

**Supplemental Figure 5: The core of vascular sprouts contains apoptotic cells.** Developing neo-vessel expressing (B) CD31, surrounded by (C) CD45<sup>+</sup> inflammatory cells and (D) Col-IV<sup>+</sup> cells. Apoptotic cells with condensed nuclei in the core of the vascular sprout (arrows) express CD31 and are CD45<sup>-</sup>. (E) DAPI stain. (A) Merge. CLSM images of intact 3D fibrin gel explant culture of OA synovial tissue on day 21, collapsed z-stack. Scale bars 10  $\mu$ m. (See also Supplemental Video 1, showing animated z-stack).
