# Supplementary material for: Vascular Morphogenesis in the Context of Inflammation: Self-Organization in a Fibrin-Based 3D Culture System
Source: PubMed Central journal article supplement (PMC5996074; doi:10.3389/fphys.2018.00679), 2018-06-05
Supplement: Image_6.pdf [file Image_6.pdf]

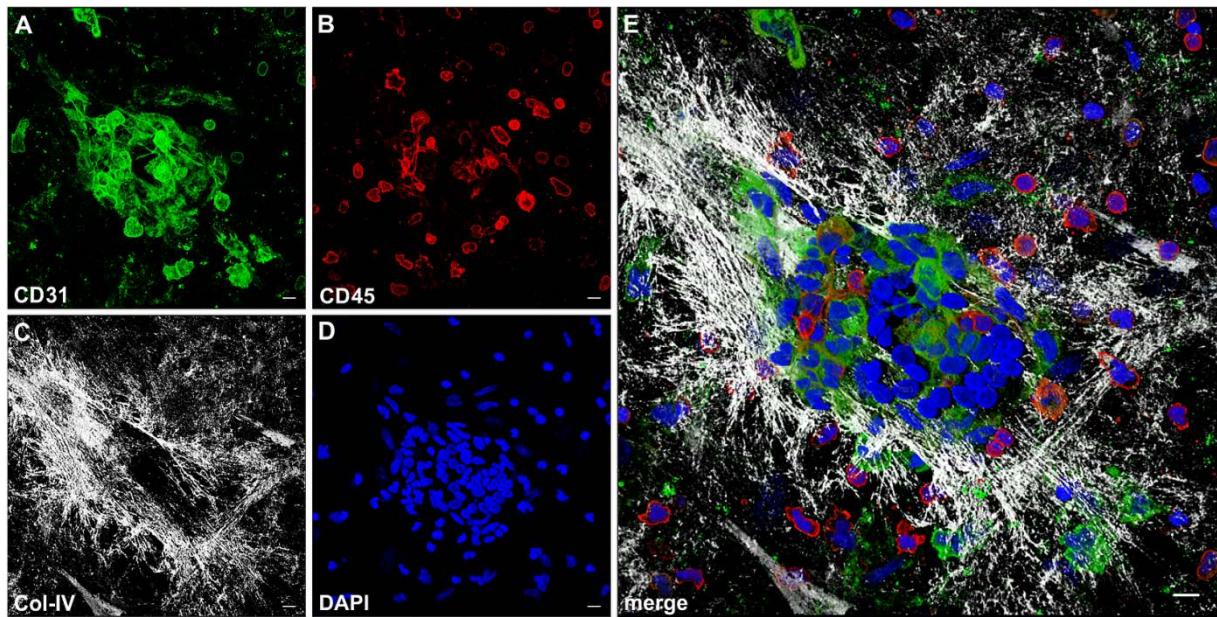

**Supplemental Figure 6: Cluster in 3D MSC-PBMC co-culture.** CLSM images of MSC-PBMC co-culture in 3D fibrin matrix on day 9. Cell cluster consisting of (A) CD31<sup>+</sup> cells (B) partially co-expressing CD45. The cluster is enwrapped in a scaffold of (C) Col-IV<sup>+</sup> stromal cells and matrix, and surrounded by CD45<sup>+</sup> leukocytes. (D) DAPI stain. (E) Merge. Collapsed z-stack. Scale bars, 10  $\mu$ m. (See also corresponding animated z-stack, Supplemental Video 3)
