# Supplementary material for: Vascular Morphogenesis in the Context of Inflammation: Self-Organization in a Fibrin-Based 3D Culture System
Source: PubMed Central journal article supplement (PMC5996074; doi:10.3389/fphys.2018.00679), 2018-06-05
Supplement: Image_7.pdf [file Image_7.pdf]

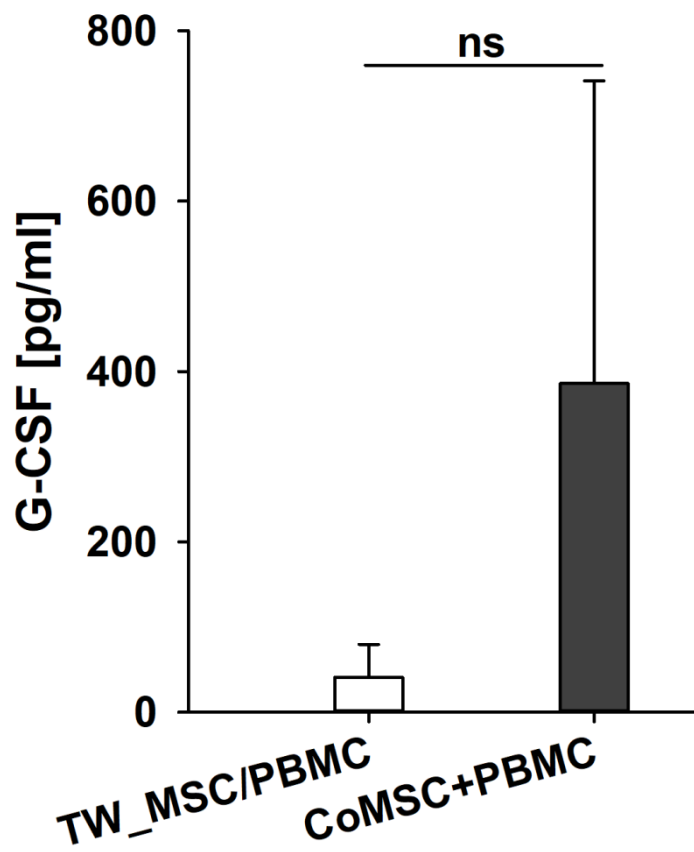

**Supplemental Figure 7: G-CSF secretion in transwell experiments.** Determination of G-CSF levels in cell-free supernatants of 3D co-cultures where MSC were physically separated from PBMC by a transwell insert with 0.4  $\mu\text{m}$  pore size, and of corresponding 3D MSC-PBMC co-cultures on day six by ELISA (n=6).
